# Supplementary material
Source: PubMed Central journal article supplement (PMC9883405)
Supplement: 42003_2023_4517_MOESM2_ESM.pdf [file 42003_2023_4517_MOESM2_ESM.pdf]

## Supplementary Information for

### **Tyrosine-targeted covalent inhibition of a tRNA synthetase aided by zinc ion**

Hang Qiao<sup>1</sup>, Mingyu Xia<sup>1</sup>, Yiyuan Cheng<sup>1</sup>, Jintong Zhou<sup>1,2</sup>, Li Zheng<sup>1,2</sup>, Wei Li<sup>3</sup>, Jing Wang<sup>1,2\*</sup>,  
Pengfei Fang<sup>1,2\*</sup>

Correspondence to: jwang@sioc.ac.cn (J.W.); fangpengfei@sioc.ac.cn (P.F.)

#### **This PDF file includes:**

Supplementary Figures 1 to 10  
Supplementary Tables 1 to 5

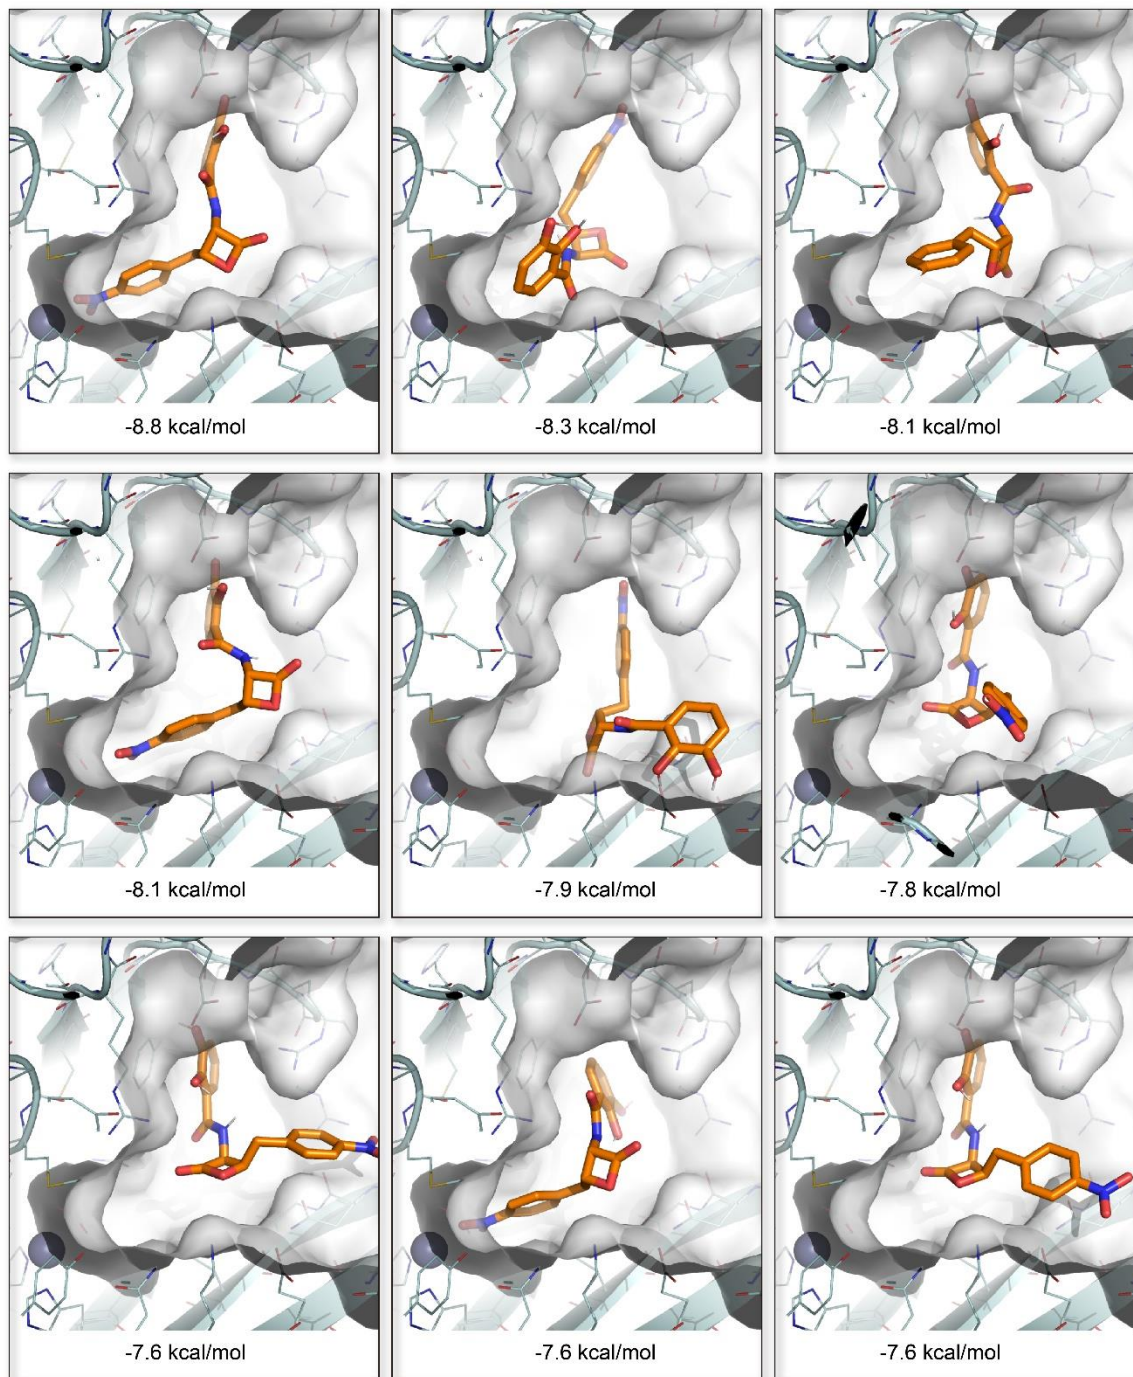

### Supplementary Figure 1.

**Molecular docking of OB in the active pocket of ThrRS.** Nine highest scoring poses of OB are shown as orange sticks. The catalytic site of *E. coli* ThrRS is shown as light cyan lines, cartoons, and a surface. The conserved Zn<sup>2+</sup> ion in ThrRS active site is shown as blue spheres.

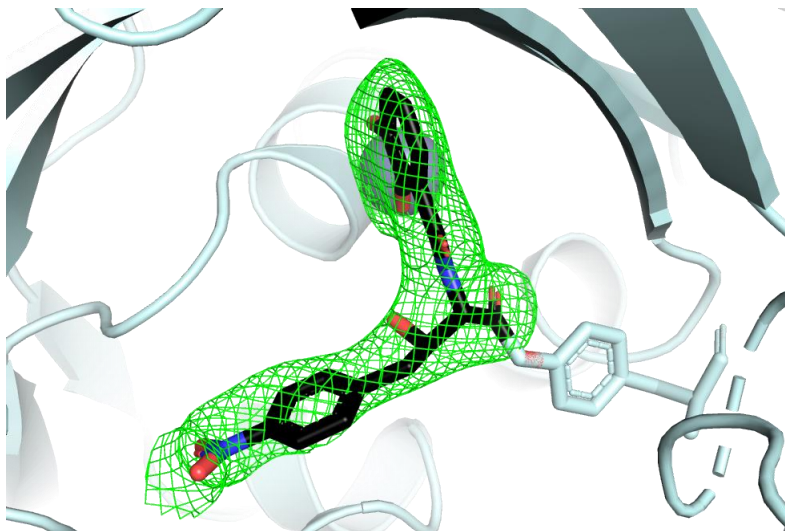

**Supplementary Figure 2.**

**The Fo-Fc electron density is calculated with the OB-omitted structure model (made from the OB-ThrRS\_WT structure), contoured at 3.0  $\sigma$ , and shown as green meshes.**

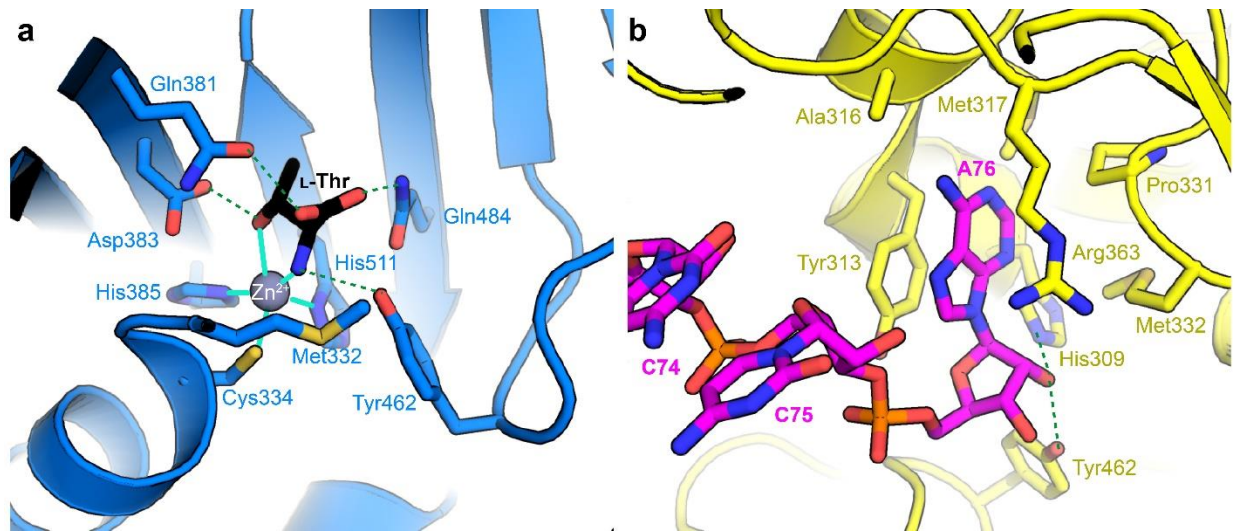

### Supplementary Figure 3.

**Molecular recognition of substrate L-threonine (L-Thr) and tRNA by ThrRS.** (a) Close-up view of the L-Thr binding pocket of *E. coli* ThrRS–L-Thr structure (PDB: 1EVK). ThrRS protein is shown as blue cartoons. The residues interacting with L-Thr are shown as sticks. The substrate L-Thr is shown as black sticks. The co-bound  $Zn^{2+}$  ion is shown as a sphere. (b) Close-up view of tRNA pocket of *E. coli* ThrRS–tRNA<sup>Thr</sup> structure (PDB: 1QF6). ThrRS protein is shown as yellow cartoons. The residues interacting with tRNA A76 are shown as sticks. The 3' end of tRNA is shown as magenta sticks.

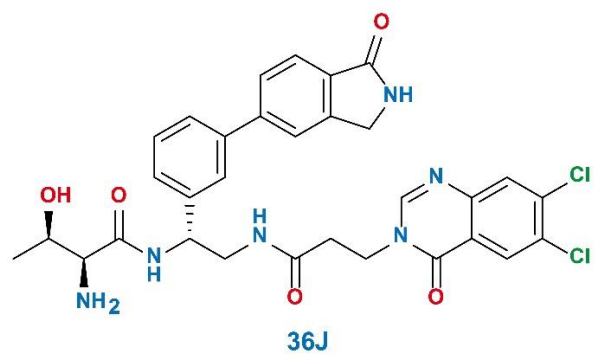

**Supplementary Figure 4.**

**Structure of compound 36j** (PubChem CID: 163409105).

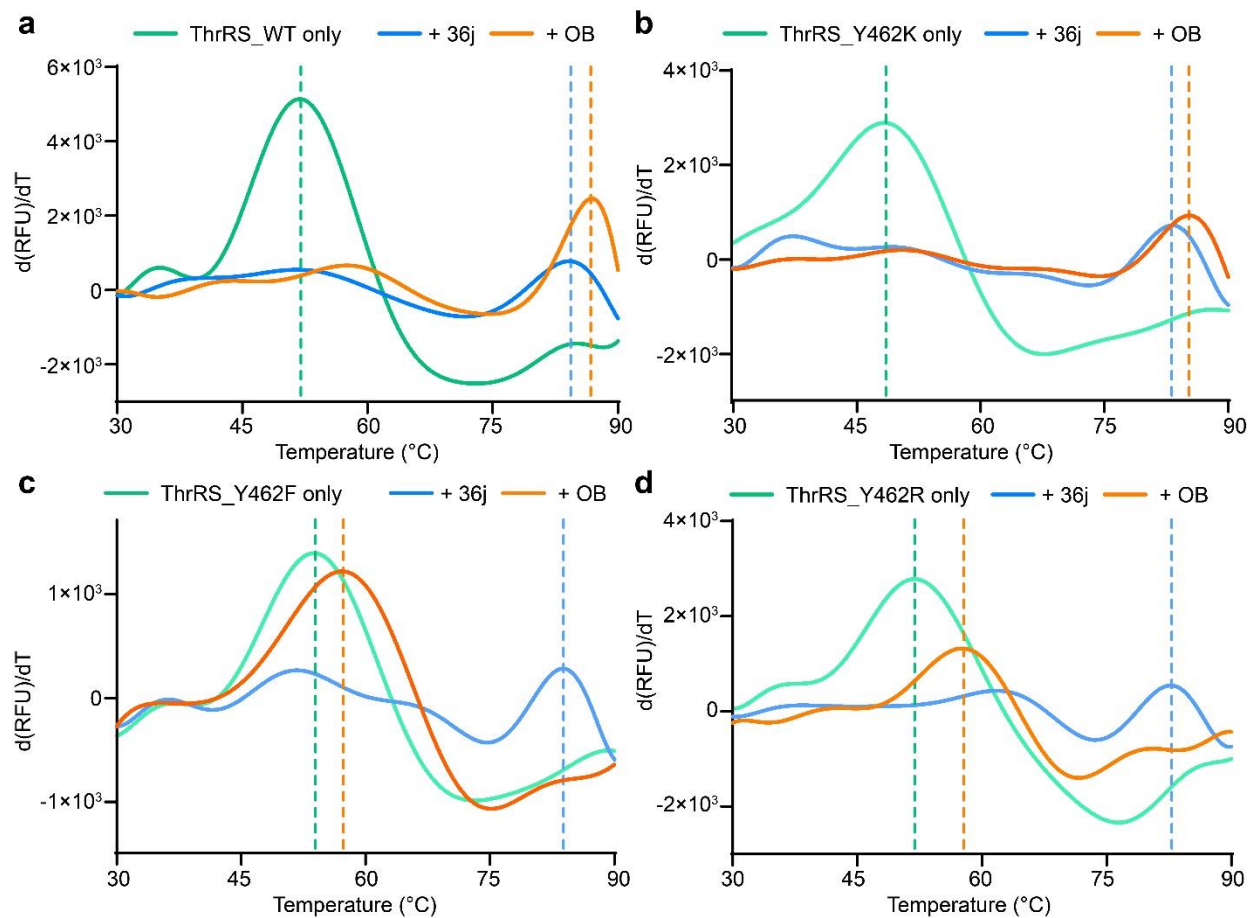

**Supplementary Figure 5.**

**First derivatives of the melting curves for *E. coli* ThrRS\_WT/Y462K/Y462F/Y462R in the presence or absence of inhibitors (OB or 36j). Data are representative of four independent assays. (a) ThrRS\_WT. (b) ThrRS\_Y462K. (c) ThrRS\_Y462F. (d) ThrRS\_Y462R.**

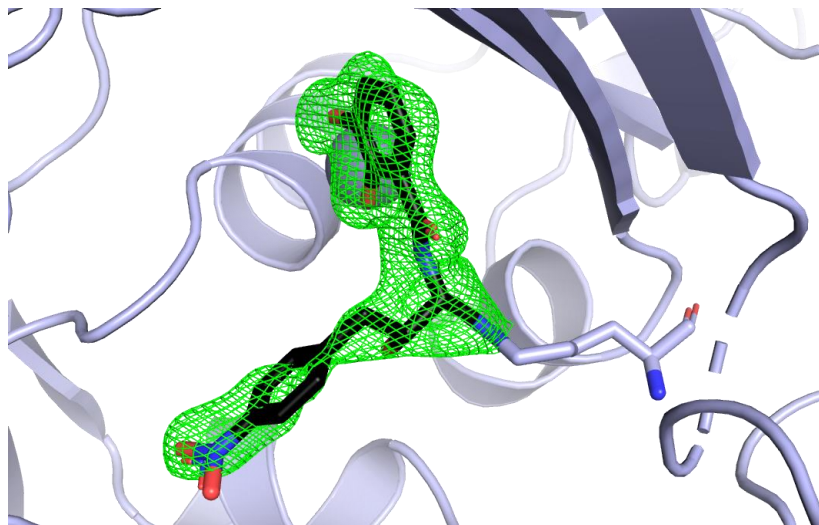

**Supplementary Figure 6.**

**The Fo-Fc electron density is calculated with the OB-omitted structure model (made from the OB-ThrRS\_Y462K structure which was obtained in the absence of ATP), contoured at 3.0  $\sigma$ , and shown as green meshes.**

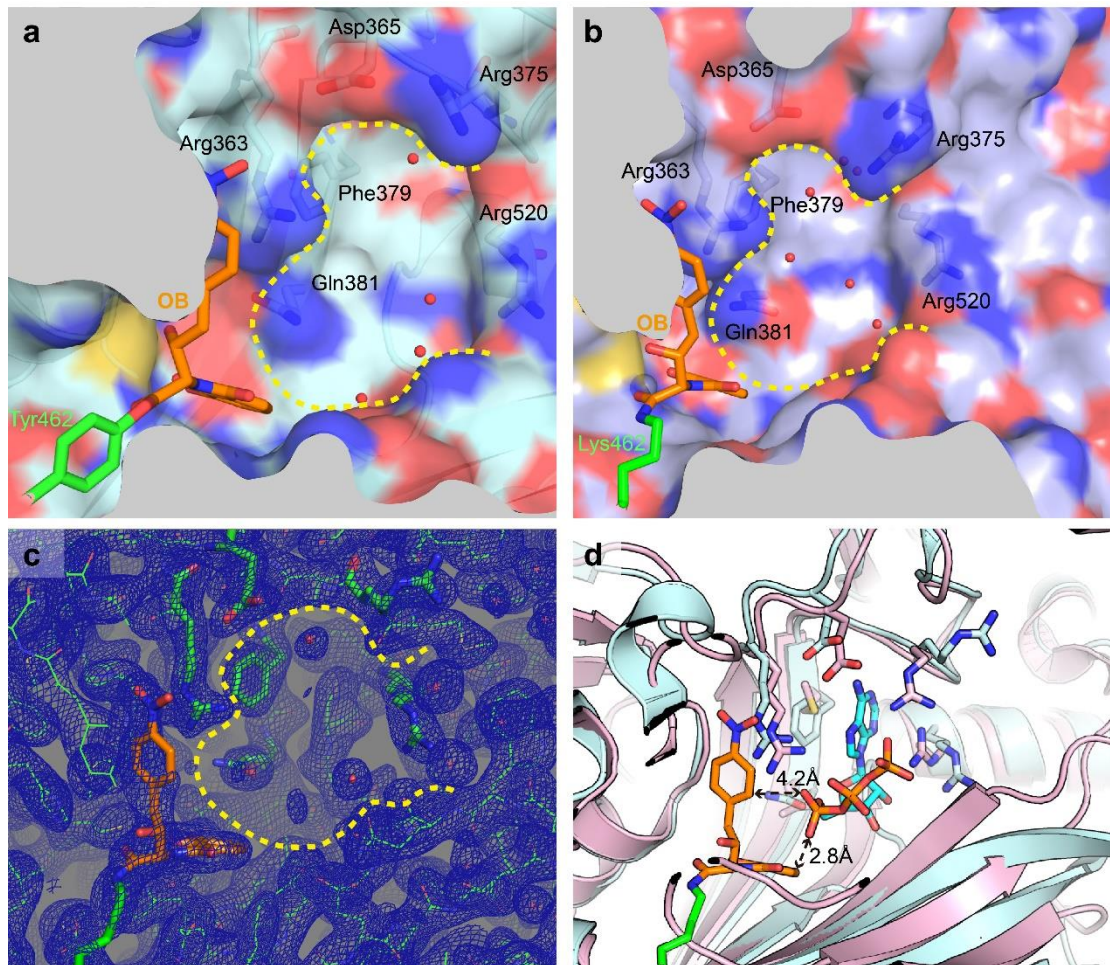

### Supplementary Figure 7.

**OB repels ATP binding by ThrRS.** (a) Close-up view of ATP-binding pocket of ThrRS\_WT-OB structure. The protein is shown as a transparent surface. The ATP binding site is indicated by yellow dotted line. OB is shown as orange sticks. The Tyr462 residue is shown as green sticks. (b) Close-up view of ATP-binding pocket of ThrRS\_Y462K-OB which was crystallized in the absence of ATP. The protein is shown as a transparent surface. The ATP binding site is indicated by a yellow dotted line. OB is shown as orange sticks. The Lys462 residue is shown as green sticks. (c) Zoomed-in view of ATP-binding pocket of ThrRS\_Y462K-OB which was crystallized in the presence of ATP. The  $2F_o-F_c$  electron map (blue meshes contoured at  $1.0 \sigma$ ) is shown together with the structure model. The ATP-binding pocket is indicated by a yellow dotted line. OB is shown as orange sticks. The Lys462 residue is shown as green sticks. (d) Superimposition of the ThrRS\_Y462K-OB structure (light cyan) onto *Staphylococcus aureus* ThrRS-ATP structure (light pink). OB and ATP are shown as sticks. The distances between the alpha phosphate of ATP and the two benzene rings of OB are 2.8 Å and 4.2 Å.



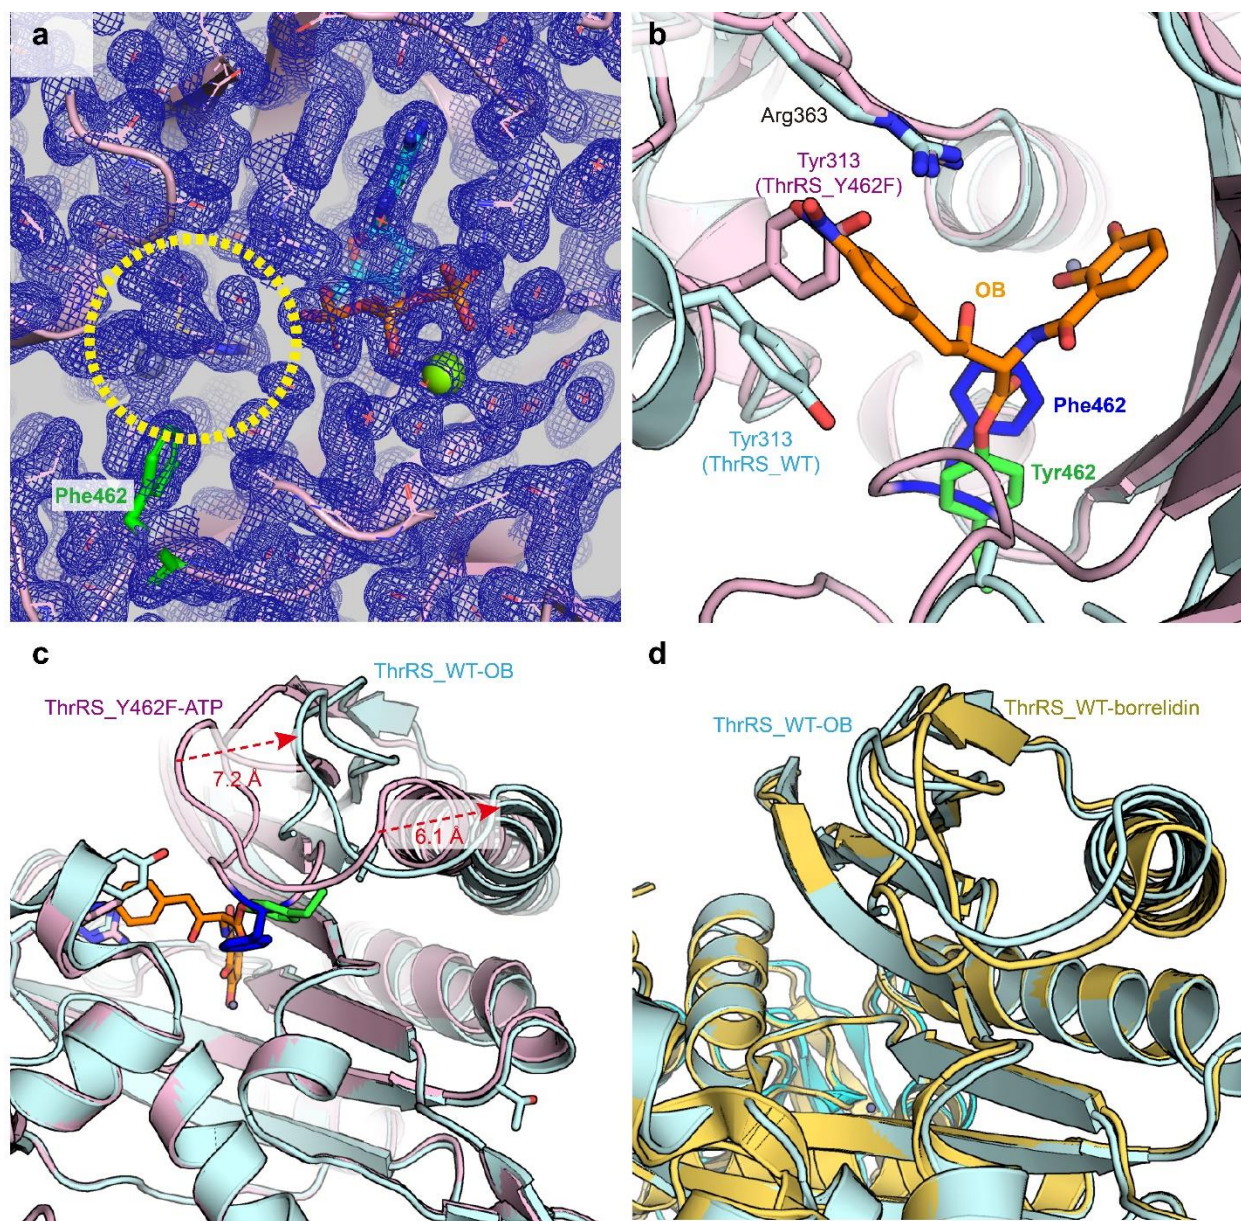

### Supplementary Figure 8.

**ATP repels OB binding by ThrRS\_Y462F mutant.** (a) Zoomed-in view of OB-binding site of ThrRS\_Y462F–ATP structure which was crystallized in the presence of OB. The 2Fo-Fc electron map (blue meshes contoured at  $1.0 \sigma$ ) is shown together with the structure model. The OB-binding site is indicated by a yellow dotted line. The Phe462 residue is shown as green sticks. (b) Superimposition of the ThrRS\_Y462F–ATP structure (light pink) onto ThrRS\_WT–OB complex structure (light cyan) showing that Tyr313 in the ThrRS\_Y462F–ATP clashes with the OB in the ThrRS\_WT–OB structure. (c) Superimposition of the ThrRS\_Y462F–ATP structure (light pink) onto ThrRS\_WT–OB complex structure (light cyan) showing that OB induces a large conformational change to the the outer side of the active site cleft. (d) Superimposition of the ThrRS\_WT–OB structure (light cyan) onto *E. coli* ThrRS–borrelidin complex structure (yellow, PDB: 4P3O).

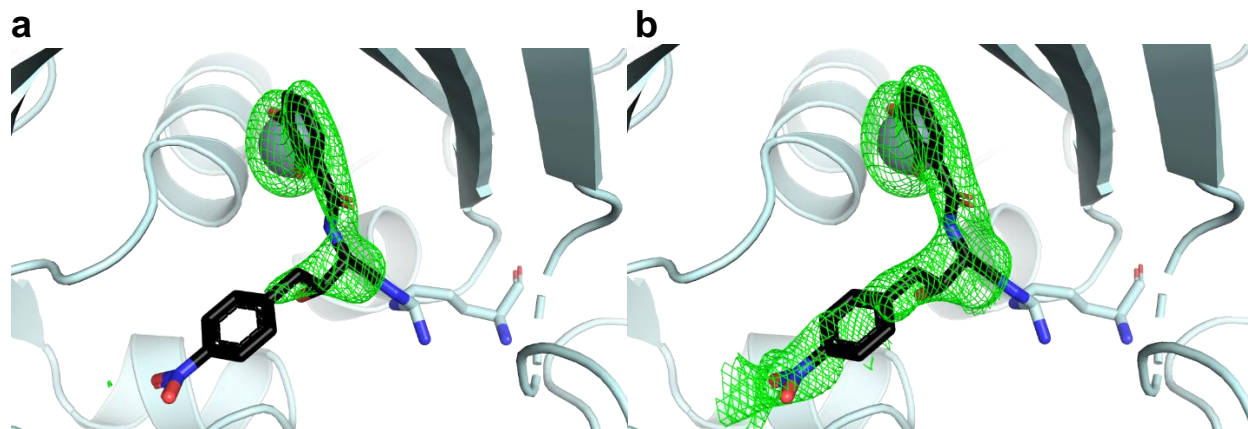

**Supplementary Figure 9.**

The Fo-Fc electron density is calculated with the OB-omitted structure model (made from the OB-ThrRS\_Y462R structure), contoured at 3.0  $\sigma$  (a) and 2.0  $\sigma$  (b), and shown as green meshes. The nitrobenzene part has a weaker electron density than the other parts probably because the longer side chain of the arginine mutant leads to a higher temperature factor of this part.

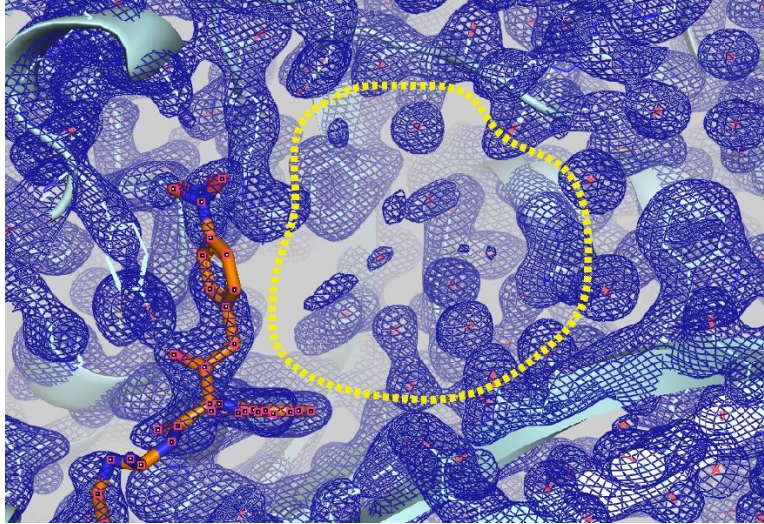

**Supplementary Figure 10.**

**OB repels ATP binding by ThrRS\_Y462R.** Zoomed-in view of ATP-binding pocket of ThrRS\_Y462R-OB which was crystallized in the presence of ATP. The 2Fo-Fc electron map (blue meshes contoured at  $1.0 \sigma$ ) is shown together with the structure model. The ATP-binding pocket is indicated by a yellow dotted line. OB is shown as orange sticks.

**Supplementary Table 1.**

Data collection and refinement statistics of the complex structure of *E. coli* ThrRS wild type protein and obafluorin (OB)

| ThrRS_WT-OB                                |                         |
|--------------------------------------------|-------------------------|
| PDB code                                   | 8H98                    |
| <b>Data collection</b>                     |                         |
| Space group                                | $P2_122_1$              |
| Cell dimensions                            |                         |
| <i>a</i> , <i>b</i> , <i>c</i> (Å)         | 95.75, 105.91, 134.70   |
| $\alpha$ , $\beta$ , $\gamma$ (°)          | 90.00, 90.00, 90.00     |
| Resolution (Å)                             | 50.00-2.50 (2.59-2.50)* |
| $R_{\text{sym}}$ or $R_{\text{merge}}$ (%) | 8.0 (103.2)             |
| <i>I</i> / <i>sI</i>                       | 8.4 (1.5)               |
| Completeness (%)                           | 97.0 (98.5)             |
| Redundancy                                 | 4.4 (4.5)               |
| <b>Refinement</b>                          |                         |
| $R_{\text{work}}$ / $R_{\text{free}}$ (%)  | 19.1/23.0               |
| No. atoms                                  |                         |
| Protein                                    | 6487                    |
| Ligand                                     | 52                      |
| Metal                                      | 2                       |
| Solvent                                    | 274                     |
| <i>B</i> -factors (Å <sup>2</sup> )        |                         |
| Protein                                    | 48.31                   |
| Ligand                                     | 48.07                   |
| Metal                                      | 36.13                   |
| Solvent                                    | 45.44                   |
| R.m.s. deviations                          |                         |
| Bond lengths (Å)                           | 0.009                   |
| Bond angles (°)                            | 1.033                   |
| Ramachandran plot                          |                         |
| <i>Most favored</i> [%]                    | 98.61                   |
| <i>Additional allowed</i> [%]              | 1.39                    |

\*Values in parentheses are for highest-resolution shell.

**Supplementary Table 2.**

Data collection and refinement statistics of the complex structure of *E. coli* ThrRS Y462K mutant and OB

|                                                          | ThrRS_Y462K-OB <sup>#</sup> |
|----------------------------------------------------------|-----------------------------|
| PDB code                                                 | 8H9A                        |
| <b>Data collection</b>                                   |                             |
| Space group                                              | <i>P3<sub>2</sub>21</i>     |
| Cell dimensions                                          |                             |
| <i>a, b, c</i> (Å)                                       | 91.62, 91.62, 121.54        |
| $\alpha, \beta, \gamma$ (°)                              | 90.00, 90.00, 120.00        |
| Resolution (Å)                                           | 50.00-1.89 (1.94-1.89)*     |
| <i>R</i> <sub>sym</sub> or <i>R</i> <sub>merge</sub> (%) | 9.6 (60.6)                  |
| <i>I</i> / <i>sI</i>                                     | 10.1 (2.8)                  |
| Completeness (%)                                         | 98.1 (85.2)                 |
| Redundancy                                               | 8.5 (3.9)                   |
| <b>Refinement</b>                                        |                             |
| <i>R</i> <sub>work</sub> / <i>R</i> <sub>free</sub> (%)  | 18.1/23.3                   |
| No. atoms                                                |                             |
| Protein                                                  | 3213                        |
| Ligand                                                   | 26                          |
| Metal                                                    | 1                           |
| Solvent                                                  | 305                         |
| <i>B</i> -factors (Å <sup>2</sup> )                      |                             |
| Protein                                                  | 28.45                       |
| Ligand                                                   | 36.69                       |
| Metal                                                    | 18.10                       |
| Solvent                                                  | 33.94                       |
| R.m.s. deviations                                        |                             |
| Bond lengths (Å)                                         | 0.013                       |
| Bond angles (°)                                          | 1.295                       |
| Ramachandran plot                                        |                             |
| <i>Most favored</i> [%]                                  | 98.98                       |
| <i>Additional allowed</i> [%]                            | 1.02                        |

\*Values in parentheses are for highest-resolution shell.

<sup>#</sup>The protein was co-crystallized with OB in the absence of ATP.

**Supplementary Table 3.**

Data collection and refinement statistics of the complex structure of *E. coli* ThrRS Y462K mutant and OB

|                                                          | ThrRS_Y462K-OB <sup>#</sup> |
|----------------------------------------------------------|-----------------------------|
| PDB code                                                 | 8H9B                        |
| <b>Data collection</b>                                   |                             |
| Space group                                              | <i>P3<sub>2</sub>21</i>     |
| Cell dimensions                                          |                             |
| <i>a</i> , <i>b</i> , <i>c</i> (Å)                       | 92.63, 92.63, 121.07        |
| $\alpha$ , $\beta$ , $\gamma$ (°)                        | 90.00, 90.00, 120.00        |
| Resolution (Å)                                           | 50.00-2.20 (2.27-2.20)*     |
| <i>R</i> <sub>sym</sub> or <i>R</i> <sub>merge</sub> (%) | 6.5 (107.2)                 |
| <i>I</i> / <i>sI</i>                                     | 11.5 (1.1)                  |
| Completeness (%)                                         | 99.9 (100.0)                |
| Redundancy                                               | 5.2 (4.4)                   |
| <b>Refinement</b>                                        |                             |
| <i>R</i> <sub>work</sub> / <i>R</i> <sub>free</sub> (%)  | 19.7/23.2                   |
| No. atoms                                                |                             |
| Protein                                                  | 3219                        |
| Ligand                                                   | 26                          |
| Metal                                                    | 1                           |
| Solvent                                                  | 97                          |
| <i>B</i> -factors (Å <sup>2</sup> )                      |                             |
| Protein                                                  | 38.86                       |
| Ligand                                                   | 38.17                       |
| Metal                                                    | 30.96                       |
| Solvent                                                  | 34.31                       |
| R.m.s. deviations                                        |                             |
| Bond lengths (Å)                                         | 0.008                       |
| Bond angles (°)                                          | 1.028                       |
| Ramachandran plot                                        |                             |
| <i>Most favored</i> [%]                                  | 98.73                       |
| <i>Additional allowed</i> [%]                            | 1.27                        |

\*Values in parentheses are for highest-resolution shell.

<sup>#</sup>The protein was co-crystallized with OB in the presence of ATP.

**Supplementary Table 4.**

Data collection and refinement statistics of the complex structure of *E. coli* ThrRS Y462F mutant and ATP

|                                                          | ThrRS_Y462F-ATP <sup>#</sup>                    |
|----------------------------------------------------------|-------------------------------------------------|
| PDB code                                                 | 8H99                                            |
| <b>Data collection</b>                                   |                                                 |
| Space group                                              | <i>P2<sub>1</sub>2<sub>1</sub>2<sub>1</sub></i> |
| Cell dimensions                                          |                                                 |
| <i>a</i> , <i>b</i> , <i>c</i> (Å)                       | 86.73, 109.99, 114.70                           |
| $\alpha$ , $\beta$ , $\gamma$ (°)                        | 90.00, 90.00, 90.00                             |
| Resolution (Å)                                           | 50.00-1.94 (1.99-1.94)*                         |
| <i>R</i> <sub>sym</sub> or <i>R</i> <sub>merge</sub> (%) | 10.0 (90.8)                                     |
| <i>I</i> / <i>sI</i>                                     | 8.9 (1.7)                                       |
| Completeness (%)                                         | 100.0 (99.9)                                    |
| Redundancy                                               | 6.2 (3.8)                                       |
| <b>Refinement</b>                                        |                                                 |
| <i>R</i> <sub>work</sub> / <i>R</i> <sub>free</sub> (%)  | 17.7/20.2                                       |
| No. atoms                                                |                                                 |
| Protein                                                  | 6468                                            |
| Ligand                                                   | 62                                              |
| Metal                                                    | 6                                               |
| Solvent                                                  | 708                                             |
| <i>B</i> -factors (Å <sup>2</sup> )                      |                                                 |
| Protein                                                  | 25.42                                           |
| Ligand                                                   | 18.15                                           |
| Metal                                                    | 22.77                                           |
| Solvent                                                  | 33.32                                           |
| R.m.s. deviations                                        |                                                 |
| Bond lengths (Å)                                         | 0.009                                           |
| Bond angles (°)                                          | 0.987                                           |
| Ramachandran plot                                        |                                                 |
| <i>Most favored</i> [%]                                  | 98.87                                           |
| <i>Additional allowed</i> [%]                            | 1.13                                            |

\*Values in parentheses are for highest-resolution shell.

<sup>#</sup>The protein was co-crystallized with ATP in the presence of OB.

**Supplementary Table 5.**

Data collection and refinement statistics of the complex structure of *E. coli* ThrRS Y462R mutant and OB

|                                                          | ThrRS_Y462R-OB <sup>#</sup> |
|----------------------------------------------------------|-----------------------------|
| PDB code                                                 | 8H9C                        |
| <b>Data collection</b>                                   |                             |
| Space group                                              | <i>P3<sub>2</sub>21</i>     |
| Cell dimensions                                          |                             |
| <i>a</i> , <i>b</i> , <i>c</i> (Å)                       | 92.18, 92.18, 120.68        |
| $\alpha$ , $\beta$ , $\gamma$ (°)                        | 90.00, 90.00, 120.00        |
| Resolution (Å)                                           | 50.00-2.14 (2.20-2.14)*     |
| <i>R</i> <sub>sym</sub> or <i>R</i> <sub>merge</sub> (%) | 8.5 (77.8)                  |
| <i>I</i> / <i>sI</i>                                     | 10.0 (1.8)                  |
| Completeness (%)                                         | 100.0 (100.0)               |
| Redundancy                                               | 9.9 (7.9)                   |
| <b>Refinement</b>                                        |                             |
| <i>R</i> <sub>work</sub> / <i>R</i> <sub>free</sub> (%)  | 22.6/27.6                   |
| No. atoms                                                |                             |
| Protein                                                  | 3239                        |
| Ligand                                                   | 26                          |
| Metal                                                    | 1                           |
| Solvent                                                  | 189                         |
| <i>B</i> -factors (Å <sup>2</sup> )                      |                             |
| Protein                                                  | 18.77                       |
| Ligand                                                   | 30.67                       |
| Metal                                                    | 24.05                       |
| Solvent                                                  | 16.17                       |
| R.m.s. deviations                                        |                             |
| Bond lengths (Å)                                         | 0.002                       |
| Bond angles (°)                                          | 0.547                       |
| Ramachandran plot                                        |                             |
| <i>Most favored</i> [%]                                  | 98.98                       |
| <i>Additional allowed</i> [%]                            | 1.02                        |

\*Values in parentheses are for highest-resolution shell.

<sup>#</sup>The protein was co-crystallized with OB in the presence of ATP.
