# Supplementary material
Source: PubMed Central journal article supplement (PMC9883405)
Supplement: 42003_2023_4517_MOESM3_ESM.pdf [file 42003_2023_4517_MOESM3_ESM.pdf]

## Description of Additional Supplementary Files

**File name:** Supplementary Data 1

**Description:** The source data behind Figure 4a.

**File name:** Supplementary Data 2

**Description:** The source data behind Figure 5a.

**File name:** Supplementary Data 3

**Description:** The source data behind Figure 5b.
